# Supplementary material for: Study of Methanol Extracts from Different Parts of Peganum harmala L. Using 1H-NMR Plant Metabolomics
Source: J Anal Methods Chem. 2018 Nov 18;2018:6532789. doi: 10.1155/2018/6532789 (PMC6276451; doi:10.1155/2018/6532789)
Supplement: Supplementary Materials — Supplemental Table: the 1H-NMR raw data of the different parts of P. harmala methanol extract. [file 6532789.f1.xlsx]

## Sheet: Sheet1
NO	0.52	0.54	0.56	0.58	0.6	0.62	0.64	0.66	0.68	0.7	0.72	0.74	0.76	0.78	0.8	0.82	0.84	0.86	0.88	0.9	0.92	0.94	0.96	0.98	1	1.02	1.04	1.06	1.08	1.1	1.12	1.14	1.16	1.18	1.2	1.22	1.24	1.26	1.28	1.3	1.32	1.34	1.36	1.38	1.4	1.42	1.44	1.46	1.48
Stem	6.30273e-07	-0.000261585	0.000453875	-9.16645e-05	-0.000103986	-0.000287536	-0.000312204	-0.000159908	-0.00128228	-0.000197996	-0.000392219	-0.000293054	-0.000154355	-0.000201893	-0.000175234	0.000624722	0.0033459	0.0164117	0.0558507	0.0684376	0.0488625	0.0708209	0.130342	0.122734	0.166288	0.120788	0.127576	0.146292	0.03542	0.0232654	0.0185274	0.0458664	0.0789662	0.113591	0.0764515	0.0572238	0.0607886	0.0806296	0.114167	0.168839	0.219828	0.204604	0.111068	0.0682982	0.0561324	0.0446809	0.0554481	0.0562456	0.262841
Stem	-5.18285e-05	-1.42659e-05	0.000376412	2.13694e-05	-0.000440721	0.00012655	-0.000819229	0.000275551	-0.000907284	-0.000873616	-0.000569439	-0.000496018	-2.92278e-05	-0.00133875	-0.00176633	-8.44758e-05	0.00164279	0.0135399	0.053622	0.0652924	0.0420507	0.0623978	0.122285	0.112736	0.14601	0.112842	0.112499	0.134768	0.0141064	0.00129313	-0.00661327	0.0196725	0.0524763	0.0844022	0.0415477	0.0247232	0.0288214	0.0473421	0.080269	0.135737	0.187985	0.167212	0.0754206	0.0234535	0.0102862	-0.000573143	0.0101762	0.0128311	0.225911
Stem	0.000387038	0.0006185	-0.000491998	0.000256805	-0.000217265	3.54379e-05	-0.00041259	0.00034758	-0.000415614	-0.000771085	0.000190316	-0.00105225	8.25644e-05	-0.000627576	-0.00129204	-0.000223128	3.09363e-05	0.0129162	0.0533633	0.0631057	0.0434708	0.0635185	0.120053	0.113357	0.159108	0.108658	0.112157	0.137482	0.0260794	0.0113415	0.00412358	0.0329676	0.0723652	0.0933177	0.0571936	0.0390767	0.0402174	0.0586299	0.0919144	0.151826	0.211325	0.192422	0.0950995	0.0522868	0.0394714	0.0267614	0.0351161	0.0340781	0.228252
Stem	-0.000160628	-0.000163256	-7.81603e-05	-0.000414532	0.000334367	-0.000218003	-0.000545845	-0.000212392	0.000152727	-0.000583005	-0.000996956	-0.000194283	-0.000122623	-0.000416921	-0.000418789	0.000305663	0.003288	0.0162387	0.0589742	0.0712799	0.0501635	0.0703079	0.131132	0.124342	0.155641	0.128711	0.129011	0.15363	0.0388284	0.025149	0.0205306	0.0466322	0.0809062	0.116074	0.0737093	0.0569004	0.0613728	0.0803231	0.115143	0.172557	0.227786	0.207865	0.120376	0.0690725	0.0555619	0.042763	0.052216	0.0524077	0.254363
Stem	-0.000147322	-0.000314518	-2.00381e-05	0.000136025	-0.000508773	-3.47227e-05	-0.000588066	-0.000153707	1.36184e-05	-0.000735178	-0.000553955	-0.000499914	-6.17342e-05	0.000412109	-0.000479559	2.66954e-05	0.0033094	0.0175699	0.0584733	0.0698455	0.0501427	0.0714802	0.13189	0.123268	0.16755	0.120222	0.129147	0.147167	0.0369838	0.0249674	0.0205676	0.0487028	0.0839775	0.11442	0.0728934	0.0569337	0.0607372	0.0816702	0.114329	0.170979	0.224085	0.207293	0.111426	0.0667763	0.0541897	0.0427838	0.0526109	0.0525405	0.260499
Root	-5.3586e-05	-3.28656e-05	0.000257017	-0.000230356	7.92215e-05	-0.000111526	-0.000210137	0.000250616	-0.000366988	-7.30262e-05	-0.000328436	8.477e-05	-0.000608911	-0.000401283	-0.000127607	-0.000118903	0.0013061	0.00656592	0.018442	0.0281958	0.0282755	0.0324765	0.0438227	0.0726623	0.0745693	0.086056	0.0284201	0.0669702	0.0701354	0.00772871	0.000152454	-0.000302383	0.0132499	0.0184452	0.0180134	0.0232899	0.0214832	0.0300308	0.0369941	0.0322693	0.0232301	0.0406072	0.0536321	0.0083632	0.00178025	-0.000163492	0.00102271	0.00571955	0.0127354
Root	0.000166113	7.42023e-06	-0.000316269	6.05043e-05	0.000151104	2.70994e-05	7.50538e-06	-8.78031e-05	-3.02876e-05	-0.00041845	-5.21062e-05	2.61652e-05	-0.000382875	-0.000386998	-0.000172021	-0.000361433	0.00106897	0.00605818	0.0178355	0.027588	0.0283294	0.0316696	0.0431401	0.069788	0.066539	0.0880863	0.0331105	0.0641339	0.0722906	0.0125632	0.00186539	0.000466	0.0113322	0.018687	0.0157747	0.0216476	0.0208285	0.0311566	0.0382869	0.033118	0.0234975	0.0326316	0.0576812	0.0104868	0.00238759	-0.00100092	-0.00123982	0.000795087	0.00490948
Root	0.000160876	-2.48969e-05	-0.000307818	7.28011e-05	0.000156309	2.53206e-05	1.99525e-05	-9.95557e-05	-6.24772e-05	-0.000401783	-4.07611e-05	2.25382e-05	-0.000378931	-0.000376094	-0.000198617	-0.00032823	0.00109716	0.00623625	0.0180571	0.0275989	0.0283065	0.032129	0.0428294	0.0699814	0.068957	0.0858015	0.0323486	0.0643008	0.0719661	0.0123666	0.00176989	0.000465018	0.011508	0.0186295	0.0159883	0.0214424	0.0210816	0.0313765	0.0381205	0.0329183	0.0234881	0.0349893	0.0551352	0.0102898	0.00231259	-0.00104087	-0.00118306	0.000874695	0.005071
Root	8.39884e-05	-0.000121752	-0.000164918	0.000161917	0.000109014	1.32094e-05	-0.000179478	-1.90077e-05	3.9248e-05	-0.000119284	-0.000164898	-0.000394847	1.50948e-06	-0.000309478	-0.000212624	4.37113e-05	0.00128832	0.00603242	0.0162909	0.026782	0.0282257	0.0314363	0.042492	0.0686742	0.0693986	0.0884627	0.0406618	0.0639767	0.0751902	0.01717	0.00424065	0.0014357	0.0117794	0.0193614	0.0181247	0.0243059	0.0220354	0.0293891	0.0370193	0.0332373	0.0240917	0.0338235	0.0553174	0.0154102	0.00422493	-0.000742457	-0.000497503	0.00157792	0.00637962
Root	-9.15109e-05	-7.45765e-07	-6.48373e-05	9.09801e-05	-0.000218222	1.9987e-05	-0.000152458	0.000240573	-0.00035521	-0.000132864	-0.000304747	0.000181457	-0.000448217	-0.00052589	-3.81446e-05	-0.000218816	0.00110092	0.00693159	0.0185087	0.028467	0.0287441	0.0331223	0.0443879	0.0731428	0.0724025	0.0879752	0.0282176	0.0666599	0.0699769	0.0079079	0.000111846	-4.90186e-05	0.0126148	0.0193634	0.0168963	0.022483	0.021572	0.0314085	0.0379431	0.0327381	0.0228782	0.0374746	0.0566521	0.00845752	0.00167508	-0.000205263	0.000468289	0.00496545	0.0119003
Testa	3.83657e-05	0.000120081	-0.000223966	0.00034571	-0.000841375	-0.000264183	-0.000300847	0.000195992	-0.000152462	-0.000241204	-0.000639179	-0.000670248	-0.000283598	-0.000789589	0.000692671	0.00221688	0.0072347	0.0214018	0.0561576	0.0704911	0.0546984	0.0764449	0.11186	0.120436	0.15757	0.127506	0.135488	0.210328	0.0521399	0.030195	0.0233493	0.0348169	0.127074	0.163198	0.206113	0.10254	0.0942656	0.107381	0.133204	0.178121	0.175859	0.179722	0.125377	0.076684	0.0390845	0.0333388	0.0345837	0.0302809	0.0906412
Testa	-6.17566e-05	-0.000400105	5.93432e-05	-0.000878211	0.000698767	-0.000539239	-0.000145006	-0.00013563	0.000480859	-0.000745805	-0.000900673	-0.000577714	7.90926e-06	0.000154834	0.00195773	0.0051007	0.0119207	0.0293343	0.065532	0.0786726	0.0614857	0.081616	0.115197	0.122093	0.170742	0.123128	0.14271	0.201864	0.0539487	0.034475	0.0288597	0.0463287	0.141022	0.167919	0.200681	0.111466	0.105145	0.123104	0.154426	0.197858	0.190516	0.199187	0.130667	0.0865501	0.0484369	0.0431998	0.0458433	0.0417809	0.103453
Testa	-0.000156136	-0.000652141	0.000245577	-0.0003071	-0.000481449	-6.01416e-05	-5.04819e-05	-0.000384997	9.81331e-06	-0.000959659	-0.000126118	-0.000756799	-7.64148e-05	-0.000147635	0.00131318	0.00444152	0.0124352	0.0315929	0.070388	0.0859835	0.0641452	0.0814052	0.115745	0.123326	0.162236	0.125557	0.139976	0.203086	0.0536998	0.028532	0.0216037	0.0350569	0.122476	0.163894	0.225894	0.112131	0.103116	0.123809	0.161032	0.203738	0.19099	0.189285	0.129582	0.0777128	0.0354018	0.0271178	0.0285802	0.0239107	0.081829
Testa	-0.000152115	-0.000109196	5.94922e-05	-0.000235091	0.000558872	-0.000236906	-0.000367422	-0.000586927	0.000132024	0.00011718	-0.000772482	-0.000917548	0.000137664	-0.000925567	-1.39311e-05	0.00134097	0.00516209	0.0186307	0.0498303	0.0656742	0.0505168	0.0722999	0.107375	0.116732	0.154784	0.125031	0.130254	0.207245	0.0504633	0.0260565	0.018932	0.0293914	0.119378	0.160901	0.220919	0.10905	0.085768	0.0951673	0.118364	0.166312	0.163747	0.170459	0.116466	0.0684777	0.0302859	0.0243313	0.0262871	0.0219757	0.081109
Testa	1.63355e-06	-0.000366864	-0.000130912	6.87929e-05	-0.000210713	-0.00016545	-0.000375064	-0.000660044	-8.16909e-05	-0.000276219	-0.000774172	-0.000595719	-0.000362974	-0.00130889	0.000190916	0.000897788	0.00569652	0.0179493	0.051497	0.0659914	0.0496136	0.0707493	0.106304	0.111295	0.1643	0.103975	0.135059	0.179578	0.0319435	0.00936857	0.00384898	0.023094	0.124329	0.159242	0.191468	0.0805144	0.0732218	0.0786188	0.107582	0.153524	0.148414	0.156194	0.0883489	0.0438978	0.0108578	0.00441262	0.00778059	0.00535868	0.0711702
Seed	0.0001342	4.57228e-05	0.000122067	-5.18306e-05	7.94607e-05	0.000153178	-0.000299992	4.28962e-05	6.84522e-05	-0.000331223	-0.000546409	-0.000342173	-4.80376e-05	-0.000531157	-0.00111522	-0.000657076	0.000872512	0.00108686	0.00499925	0.0139189	0.0324288	0.0394114	0.0309938	0.0421316	0.0342328	0.0511825	0.0610607	0.0240107	0.087531	0.0157087	0.0067255	-0.00199084	-0.00130118	0.0454019	0.101829	0.0530503	0.0553901	0.0298007	0.0329074	0.0229208	0.0517161	0.077123	0.0704991	0.0539624	0.0317206	0.0139167	0.00772896	0.00268133	7.49664e-05
Seed	0.000143507	0.000266001	8.40481e-05	-0.000559191	5.44878e-05	3.76373e-05	8.78304e-05	0.000202656	-0.000264006	-0.000260796	5.94731e-05	0.000308551	-0.000712252	-0.000303503	-0.000407708	4.32393e-05	0.00135717	0.00316791	0.00610566	0.0119691	0.0213764	0.0218026	0.0256928	0.0399694	0.0350177	0.0515221	0.0627523	0.0334706	0.0810614	0.028645	0.0153847	0.0038312	0.00271688	0.042988	0.0904645	0.0641129	0.0623263	0.0378181	0.0364357	0.0237306	0.0203231	0.0265903	0.0261517	0.0287535	0.0129866	0.00380277	0.00172836	-0.000934779	-0.00265634
Seed	-0.000202892	-8.17821e-05	-0.000231612	0.000232091	0.000297348	-0.000471348	0.000218557	8.22872e-05	-0.000218907	-0.000433605	0.000166003	-0.000279352	-0.000692653	-0.000429693	-0.00119549	-0.00013453	0.000182943	0.00193476	0.0061615	0.0134153	0.0232467	0.0202449	0.0254661	0.0427602	0.032781	0.0554198	0.0618471	0.0314292	0.0874998	0.0138005	0.00685316	-0.000788273	0.00274851	0.0603669	0.0974587	0.0588967	0.0561828	0.0298412	0.0328268	0.0193166	0.0178139	0.0228478	0.0249757	0.0261683	0.0089216	6.15734e-05	0.000848864	-0.000905346	-0.00238056
Seed	0.000150399	0.000229159	0.000132695	-0.000185798	-0.000118522	7.15423e-05	-1.0277e-05	-4.24465e-05	-0.000210678	-0.000399907	6.03524e-05	0.000173311	-0.000621082	-0.00102378	-0.00106245	-0.000518611	0.000243714	0.0023783	0.00599243	0.0138437	0.0250691	0.0229943	0.0262164	0.0433945	0.032414	0.054603	0.0613772	0.0300229	0.0865172	0.0134929	0.0063095	-0.00120381	0.00272323	0.0594573	0.0963773	0.0543565	0.0540456	0.0300888	0.0335375	0.0209696	0.023905	0.0310186	0.0302462	0.0290609	0.0106117	0.000966604	0.000886195	-0.00126347	-0.00170912
Seed	3.97379e-05	0.000356216	0.000106582	-0.000120045	0.000301988	-0.000128596	-0.000218493	3.80848e-05	-0.000273931	0.000139501	-0.000263751	-0.000258869	3.29042e-05	-0.000713467	-0.00105347	-0.000427116	0.000183848	0.00155069	0.00531831	0.0116741	0.021867	0.0221443	0.0249866	0.0405466	0.033524	0.0509072	0.063262	0.0296184	0.0812883	0.0244183	0.0100527	9.63191e-05	0.00151191	0.0469181	0.0925345	0.0560269	0.0539951	0.0334898	0.0350036	0.0224875	0.0219265	0.028485	0.0298715	0.0304045	0.0128338	0.00260501	0.00150239	-0.000400192	-0.00181468
Flower	-0.000275092	-0.00019423	0.000251812	-0.000374823	-0.000145455	-2.74208e-05	-0.000384376	-0.000161946	-0.000473228	-0.000271277	-0.000907204	-0.000525504	0.000225132	0.000934511	0.00515524	0.0123954	0.0298769	0.055638	0.0759669	0.077991	0.0746071	0.138614	0.181059	0.179787	0.21818	0.236933	0.141554	0.311995	0.0344664	0.0229712	0.011825	0.0149462	0.0552217	0.0755609	0.179908	0.722864	0.682335	0.193945	0.202879	0.197392	0.119947	0.142169	0.103696	0.0370873	0.0113041	0.00441417	0.00507337	0.0067925	0.17962
Flower	-1.03528e-05	0.000163138	-0.000236388	-0.000282561	6.96291e-05	-0.000519258	-2.2975e-05	-0.000703747	-0.000666879	0.000339912	-0.000660232	-0.000705816	-0.000983982	-0.000761806	0.00102425	0.00545532	0.0186715	0.0386505	0.0606935	0.0672753	0.0686187	0.126924	0.180563	0.169609	0.229773	0.218691	0.18158	0.259068	0.0310307	0.0208822	0.00737633	0.0118364	0.0486551	0.0685496	0.17699	0.713847	0.675375	0.15329	0.169392	0.170721	0.0993522	0.134998	0.0857381	0.0298881	0.00665952	0.00133056	0.00309813	0.00662728	0.182778
Flower	1.53026e-05	0.000163798	2.46255e-05	-0.00030795	-0.000100239	-0.000274556	-0.000314462	-0.000650116	0.000204648	2.13737e-05	-0.000712089	-0.000269507	-0.000621924	-0.000379972	0.00195937	0.00646619	0.0174358	0.035221	0.0557432	0.065359	0.0705775	0.128935	0.18079	0.169899	0.233566	0.210872	0.181699	0.250619	0.0283952	0.0201534	0.00864682	0.0139271	0.0491668	0.0747843	0.172661	0.690637	0.699811	0.130049	0.147053	0.153547	0.0859131	0.12557	0.0758076	0.0255179	0.00488059	0.00206252	0.0049942	0.0116635	0.183569
Flower	8.74478e-05	4.28358e-05	-1.29787e-06	5.81698e-05	-0.00031051	-0.000165884	-0.000309207	0.000275767	0.000271259	-0.000476592	-0.00119743	-0.000409988	-0.00119593	-0.00148345	-0.000191957	0.00317833	0.0167243	0.0392326	0.0604851	0.0668395	0.0735877	0.139068	0.156812	0.148332	0.308315	0.155145	0.182097	0.20676	0.0319479	0.0206333	0.0040758	0.0064956	0.036919	0.0666799	0.162257	0.682628	0.838242	0.190386	0.190912	0.179935	0.100184	0.162522	0.0577151	0.0289111	0.00714503	0.00137217	7.90886e-05	0.0047114	0.169415
Flower	0.000114049	0.0001473	0.000167253	-0.000131803	-0.000257513	-0.000451272	-0.000327953	2.76676e-05	-8.57711e-05	-0.000401052	-0.000953482	-0.000210335	-0.000591206	-0.000966307	0.000471234	0.00386124	0.0133674	0.0297998	0.0497096	0.0610024	0.0657992	0.128054	0.17908	0.172349	0.224174	0.222694	0.171101	0.271101	0.0299138	0.0202534	0.00798542	0.0113765	0.0468593	0.069769	0.162652	0.668536	0.735078	0.13015	0.143935	0.153255	0.0861935	0.123019	0.0828101	0.0262316	0.00471291	0.00162685	0.00431987	0.0098633	0.18461
Leaf	-4.86346e-05	0.000113927	-0.000253707	4.75145e-05	-0.00051708	-0.000155847	-0.000365734	-0.000301003	-0.000121533	-0.000518097	-0.000845526	-0.00117086	-0.000292698	-0.00140287	-0.00140963	0.000383272	0.00516682	0.0200365	0.0758444	0.102925	0.123479	0.13863	0.216814	0.328459	0.325366	0.278123	0.164041	0.403665	0.16917	0.103436	0.073294	0.0794842	0.188814	0.232198	0.474272	0.239274	0.177363	0.201134	0.272779	0.306396	0.399699	0.403686	0.278213	0.181484	0.13667	0.105494	0.112501	0.0995175	0.107066
Leaf	-0.000206761	-0.000289321	2.9628e-05	-0.000331961	-0.000750877	-0.000653746	-0.000649945	-4.88548e-05	-0.00102942	-0.000699036	-0.00100728	-0.000963702	-0.000322977	-5.61014e-05	0.00235642	0.00850782	0.019126	0.0463845	0.111549	0.141017	0.14543	0.175898	0.276877	0.360293	0.318509	0.280949	0.194979	0.447848	0.129866	0.104243	0.0846095	0.112355	0.237271	0.297796	0.453387	0.260202	0.208617	0.251873	0.332568	0.369115	0.475876	0.413616	0.282722	0.184771	0.150079	0.118472	0.144094	0.120913	0.218089
Leaf	-8.46325e-05	-0.000352265	-0.000592232	-0.00044526	0.000337437	7.04071e-05	-0.00081917	-0.000284232	-0.000510764	-0.000702799	-0.000634635	-0.00126126	3.68498e-06	-0.000449679	4.76897e-05	0.0028699	0.0102029	0.0269418	0.0824774	0.111521	0.137614	0.147789	0.210044	0.353867	0.342759	0.294179	0.165878	0.337273	0.24854	0.110131	0.0806459	0.0835607	0.15592	0.263425	0.43224	0.317033	0.192085	0.214897	0.289182	0.326566	0.40838	0.434186	0.290642	0.191692	0.142458	0.113427	0.110742	0.114635	0.108048
Leaf	-0.000133109	9.27041e-05	5.07699e-05	-6.75894e-05	4.20014e-05	-0.000593542	-9.68814e-05	-0.000490177	-0.000262969	-0.00086142	-0.000969288	-0.000802666	0.000262164	-0.00186443	-0.00102552	0.000745768	0.00469111	0.0204959	0.0771662	0.105646	0.125634	0.141357	0.221551	0.335485	0.33259	0.284038	0.166121	0.413556	0.170775	0.103819	0.0726785	0.0789289	0.190589	0.235172	0.482214	0.242085	0.17924	0.202844	0.276151	0.310094	0.405725	0.409497	0.281757	0.180847	0.135101	0.102651	0.110418	0.0960797	0.103267
Leaf	-0.000186129	6.6316e-05	-0.000372992	0.00021124	-0.000597215	-0.000648867	-0.000786963	-0.000578135	-0.000807724	-0.000267875	-0.000809085	-0.000137359	-3.30174e-05	0.000803701	0.00332713	0.0102845	0.0222212	0.0493993	0.114128	0.142851	0.147388	0.177514	0.278125	0.361682	0.320717	0.282598	0.197154	0.449117	0.130979	0.105827	0.0858059	0.112626	0.237307	0.296474	0.453585	0.260423	0.208515	0.250811	0.332685	0.369036	0.475776	0.413908	0.283664	0.186329	0.149742	0.118422	0.143547	0.120371	0.216604
[truncated: 426 more columns]
